# Supplementary material for: The oxidative degradation of phenol via in situ H2O2 synthesis using Pd supported Fe-modified ZSM-5 catalysts
Source: Royal Society of Chemistry journal article supplement (doi:10.1039/d2cy00283c), 2022-01-01
Supplement: d2cy00283c1.pdf [file d2cy00283c1.pdf]

## Supporting Information.

### **The Oxidative Degradation of Phenol via in-situ H<sub>2</sub>O<sub>2</sub> Synthesis Using Pd Supported Fe-modified ZSM-5 Catalysts.**

Alba Santos,<sup>[a]</sup> Richard J. Lewis,<sup>[a]\*</sup> David J. Morgan,<sup>[a][b]</sup> Thomas E. Davies,<sup>[a]</sup> Euan Hampton,<sup>[c]</sup> Paul Gaskin<sup>[c]</sup> and Graham J. Hutchings<sup>\*[a]</sup>

<sup>[a]</sup>Max Planck centre for Fundamental Heterogeneous Catalysis (FUNCAT), Cardiff Catalysis Institute, School of Chemistry, Cardiff University, Main Building, Park Place, Cardiff, CF10 3AT, United Kingdom.

<sup>[b]</sup>HarwellXPS, Research Complex at Harwell (RCaH), Didcot, OX11 OFA, United Kingdom.

<sup>[c]</sup>Dŵr Cymru Welsh Water, Pentwyn Road, Nelson, Treharris, CF46 6LY, United Kingdom.

<sup>†</sup>These authors contributed equally to this work

\* LewisR27@Cardiff.ac.uk, Hutch@Cardiff.ac.uk

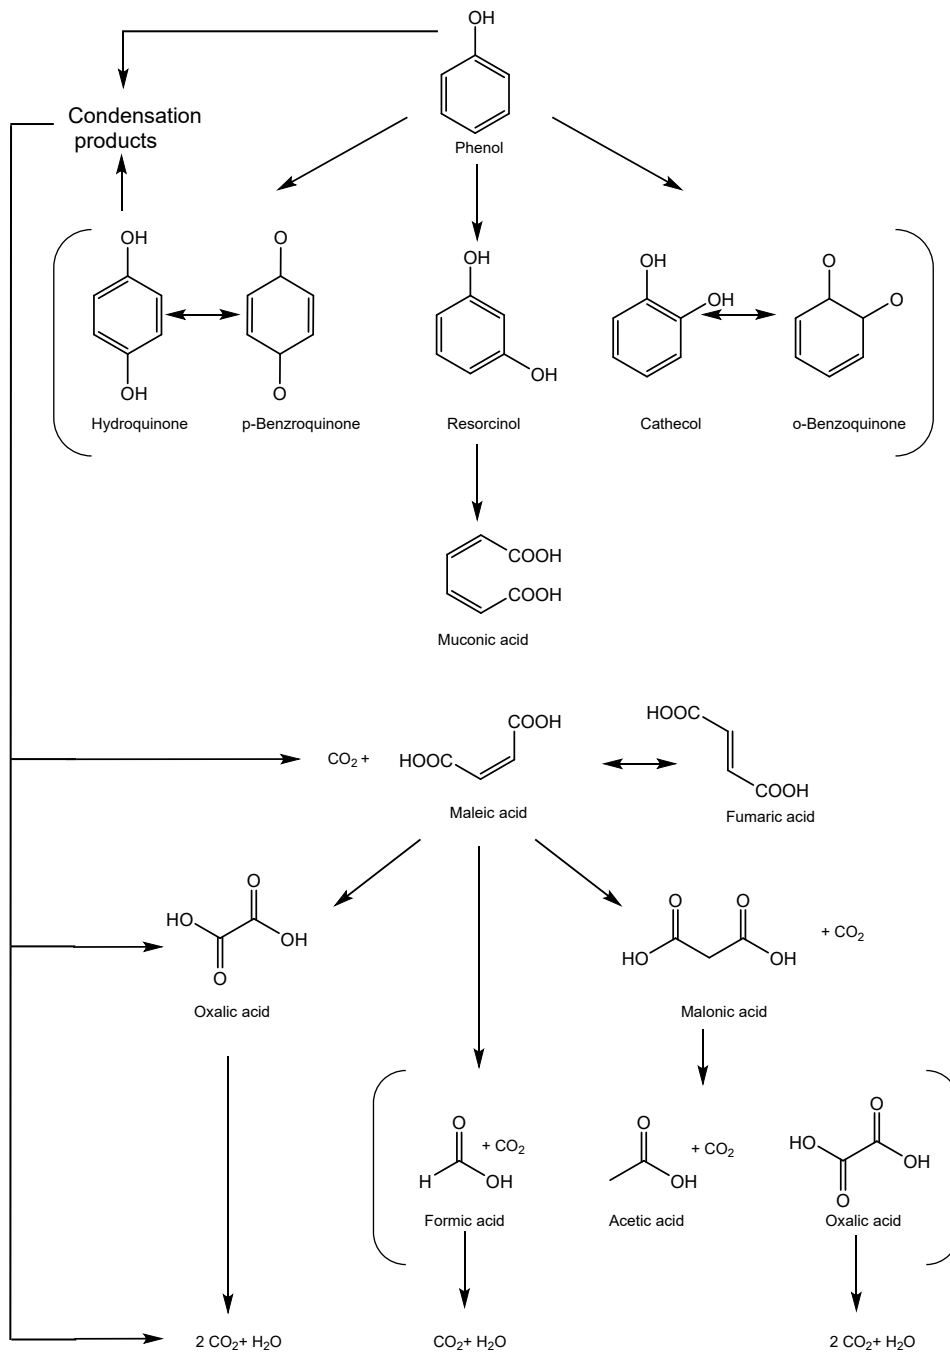

**Figure S.1.** The proposed oxidative degradation products of phenol.

**Table S.1.** Nominal and actual metal loading of 0.5%Pd/Fe-ZSM-5 catalysts, as determined by microwave aqua regia assisted digestion of fresh materials.

| Catalyst                   | Actual Pd loading / wt.% | Actual Fe loading / wt.% |
|----------------------------|--------------------------|--------------------------|
| 0.5 wt.%Pd/3 %Fe-HZSM-5    | 0.51                     | 2.69                     |
| 0.5 wt.%Pd/1%Fe-HZSM-5     | 0.47                     | 0.73                     |
| 0.5 wt. %Pd/0.5%Fe-HZSM-5  | 0.51                     | 0.45                     |
| 0.5 wt.%Pd/0.125%Fe-HZSM-5 | 0.48                     | 0.15                     |
| 0.5 wt.%Pd/0.06%Fe-HZSM-5  | 0.50                     | 0.05                     |
| 0.5 wt.%Pd/HZSM-5          | 0.51                     | 0.00                     |
| HZSM-5 (28) (synthesised)  | 0.0                      | 0.00                     |

**Note:** All samples exposed to reductive heat treatment (4 h, 500 °C, 10 °C min<sup>-1</sup>, 5%H<sub>2</sub>/Ar).

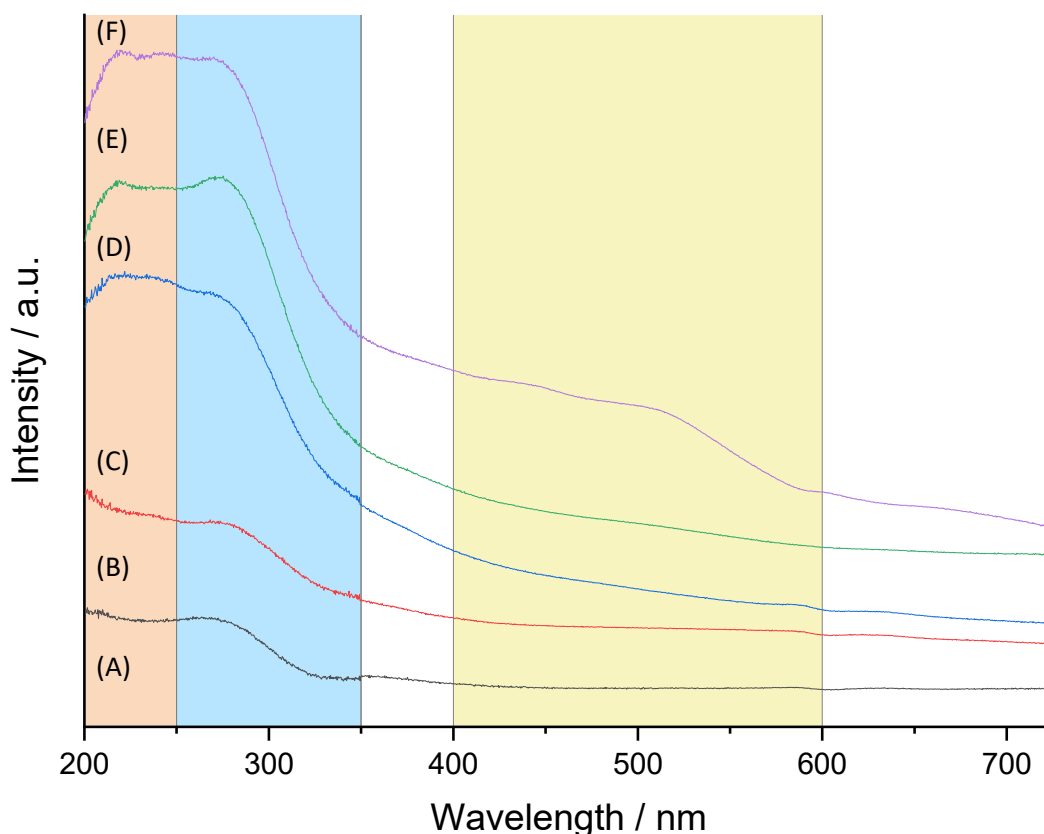

**Figure S.2.** UV-visible reflectance spectra of 0.5.%Pd/Fe-ZSM-5 catalysts, as a function of total Fe incorporation. **(A)** 0.5%Pd/ZSM-5, **(B)** 0.5%Pd/0.06%Fe-ZSM-5, **(C)** 0.5%Pd/0.125%Fe-ZSM-5, **(D)** 0.5%Pd/0.5%Fe-ZSM-5, **(E)** 0.5%Pd/1%Fe-ZSM-5 and **(F)** 0.5%Pd/3%Fe-ZSM-5 **Note:** All samples exposed to reductive heat treatment (4 h, 500 °C, 10 °C min<sup>-1</sup>, 5%H<sub>2</sub>/Ar).

### Supplementary Note 1.

The presence of reflectance bands between 200-250 nm (orange) and 250-350 nm (blue) are considered to be indicative of Fe<sup>3+</sup> tetrahedrally coordinated within the ZSM-5 lattice, in addition to isolated and bi-nuclear Fe species immobilised within the zeolitic framework channels. While the bands observed above 450 nm (yellow) are attributed to the presence of extra-framework Fe<sub>x</sub>O<sub>y</sub> particles (clusters and agglomerates).<sup>1</sup>

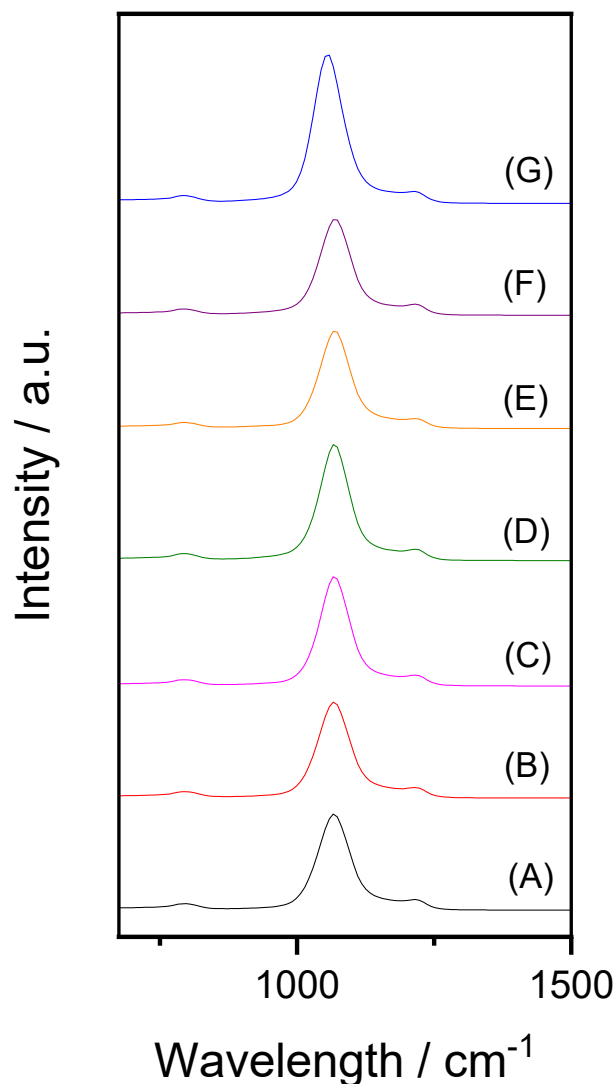

**Figure S.3.** FTIR spectra of 0.5.%Pd/Fe-ZSM-5 catalysts, as a function of total Fe incorporation. **(A)** commercial ZSM-5, **(B)** 0.5%Pd/ZSM-5, **(C)** 0.5%Pd/0.06%Fe-ZSM-5, **(D)** 0.5%Pd/0.125%Fe-ZSM-5, **(E)** 0.5%Pd/0.5%Fe-ZSM-5, **(F)** 0.5%Pd/1%Fe-ZSM-5 and **(G)** 0.5%Pd/3%Fe-ZSM-5. **Note:** All samples exposed to reductive heat treatment (4 h, 500 °C, 10 °C min<sup>-1</sup>, 5% H<sub>2</sub>/Ar).

### Supplementary Note 2.

It is possible to observe three distinct bands in the FTIR spectra of the 0.5.%Pd/Fe-ZSM-5 catalysts, at approximately 800, 1050 and 1220 cm<sup>-1</sup>, which is characteristic of the SiO<sub>4</sub> tetrahedron units. The adsorption band at 1050 cm<sup>-1</sup> is attributed to the internal asymmetric stretching vibrations of Si-O linkages and has been observed to shift towards higher wavenumbers with increasing SiO<sub>2</sub>: Al<sub>2</sub>O<sub>3</sub> ratios. The adsorption band at 1220 cm<sup>-1</sup> is typically utilised to provide information on the structure of the zeolite and has been assigned to the 5-membered rings present within the framework structure of ZSM-5.<sup>2</sup> The bands at 800 cm<sup>-1</sup> are assigned to the symmetric stretching of the external linkages of the SiO<sub>4</sub> tetrahedron.

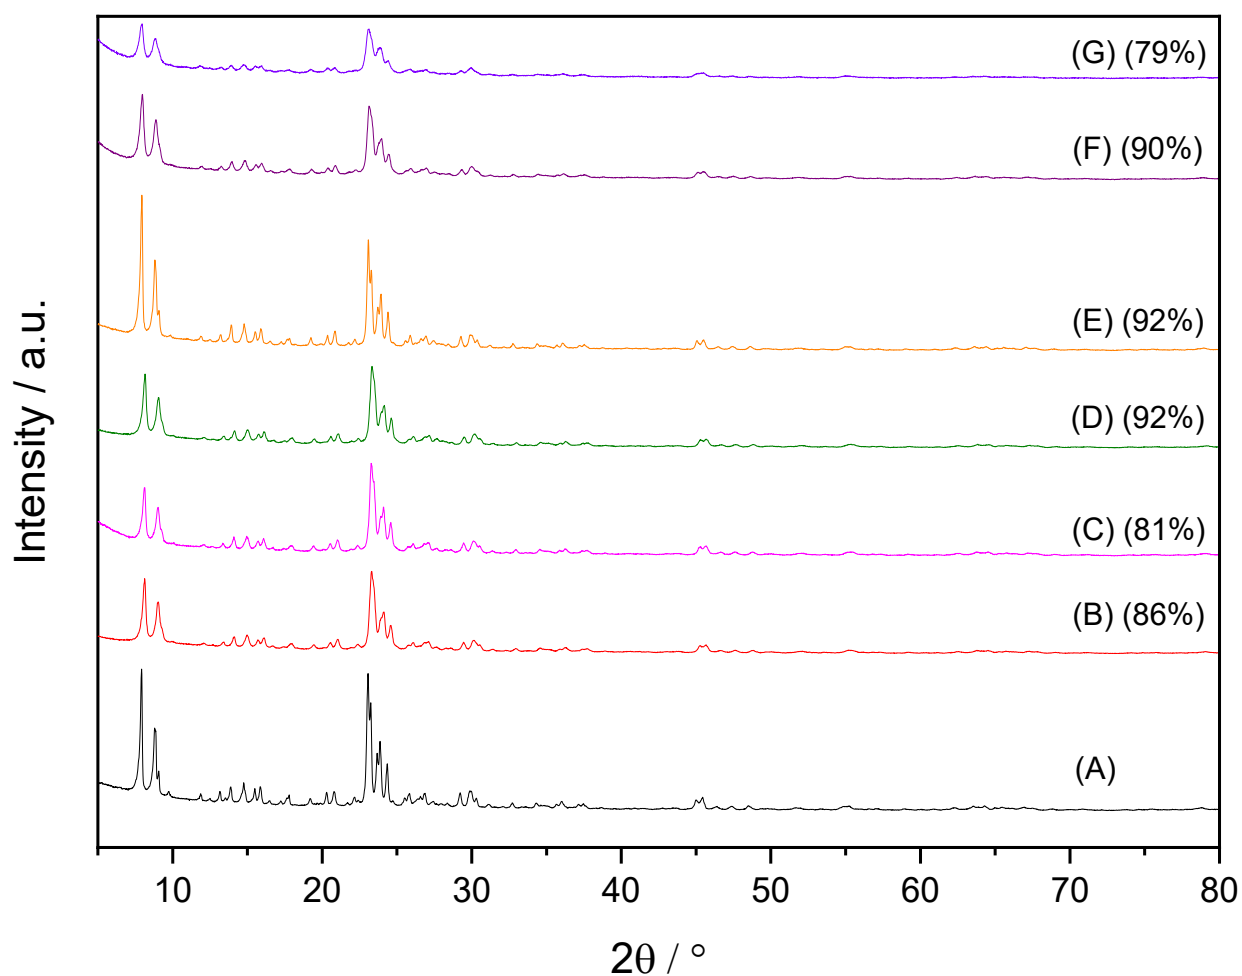

**Figure S.4.** X-ray diffractograms of 0.5.%Pd/Fe-ZSM-5 catalysts, as a function of total Fe incorporation. **(A)** commercial ZSM-5, **(B)** 0.5%Pd/ZSM-5 **(C)** 0.5%Pd/0.06%Fe-ZSM-5 **(D)** 0.5%Pd/0.125%Fe-ZSM-5 **(E)** 0.5%Pd/0.5%Fe-ZSM-5 **(F)** 0.5%Pd/1%Fe-ZSM-5 **(G)** 0.5%Pd/3%Fe-ZSM-5. **Note 1:** All samples exposed to reductive heat treatment (4 h, 500 °C, 10 °C min<sup>-1</sup>, 5%H<sub>2</sub>/Ar). **Note 2:** Values in parentheses indicate crystallinity of synthesised materials, as compared to commercial ZSM-5.

### Supplementary Note 3.

Reflection's characteristic of ZSM-5 can be observed at  $\theta=7-9^\circ$  and  $\theta=23-25^\circ$ .<sup>3</sup>

**Table S.2.** Summary of porosity and surface area of 0.5.%Pd-Fe-ZSM-5 catalysts as a function of Fe incorporation.

| Catalysts                  | Surface area / m <sup>2</sup> g <sup>-1</sup> [a] | V <sub>micropore</sub><br>cm <sup>3</sup> g <sup>-1</sup> |
|----------------------------|---------------------------------------------------|-----------------------------------------------------------|
| 0.5 wt.%Pd/3 %Fe-HZSM-5    | 259                                               | 0.04                                                      |
| 0.5 wt.%Pd/1%Fe-HZSM-5     | 281                                               | 0.05                                                      |
| 0.5 wt.%Pd/0.5%Fe-HZSM-5   | 345                                               | 0.07                                                      |
| 0.5 wt.%Pd/0.125%Fe-HZSM-5 | 348                                               | 0.08                                                      |
| 0.5 wt.%Pd/0.06%Fe-HZSM-5  | 399                                               | 0.07                                                      |
| 0.5 wt.%Pd/HZSM-5          | 407                                               | 0.09                                                      |
|                            | 491                                               | 0.11                                                      |
| HZSM-5 (28) (synthesised)  | 516                                               | 0.12                                                      |
|                            |                                                   |                                                           |
| HZSM-5 (30) (commercial)   | 413                                               | 0.15                                                      |

[a] Surface area determined from nitrogen adsorption measurements using the BET equation. **Note:** Synthesised and commercial ZSM-5 materials were exposed to an oxidative heat treatment (flowing air, 550 °C, 3 h, 1 °Cmin<sup>-1</sup>), while metal immobilised catalysts were exposed to an oxidative heat treatment (static air, 550 °C, 3 h, 10 °Cmin<sup>-1</sup>), prior to a subsequent reductive heat treatment (5%H<sub>2</sub>/Ar, 400 °C, 4 h, 10 °Cmin<sup>-1</sup>).

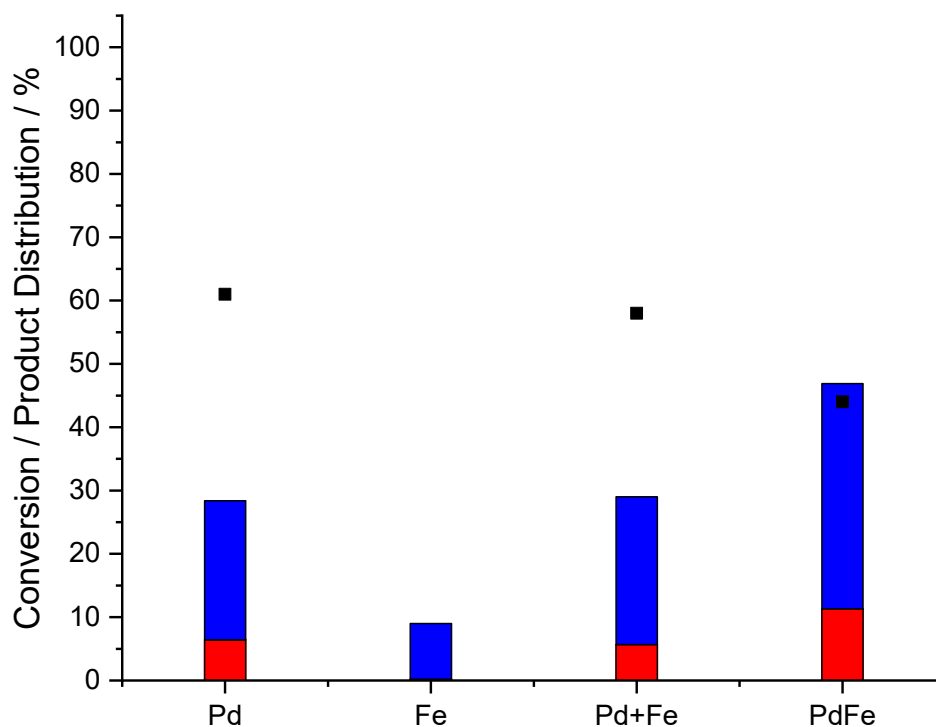

**Figure S.5.** Catalytic performance of ZSM-5 based catalysts towards the oxidative degradation of phenol via in-situ H<sub>2</sub>O<sub>2</sub> synthesis. **Key:** Selectivity towards phenolic derivatives (Red bar), Selectivity towards organic acids (Blue bar), H<sub>2</sub> conversion (Black squares). **Phenol oxidation reaction conditions:** Catalyst (0.01 g), Phenol (1000 ppm), 5% H<sub>2</sub>/CO<sub>2</sub> (420 psi), 25% O<sub>2</sub>/CO<sub>2</sub> (160 psi), 1200 rpm, 30 °C, 2 h. **Note 1 :** Total metal loading is identical in all cases. **Note 2:** All samples exposed to reductive heat treatment (4 h, 500 °C, 10 °C min<sup>-1</sup>, 5%H<sub>2</sub>/Ar).

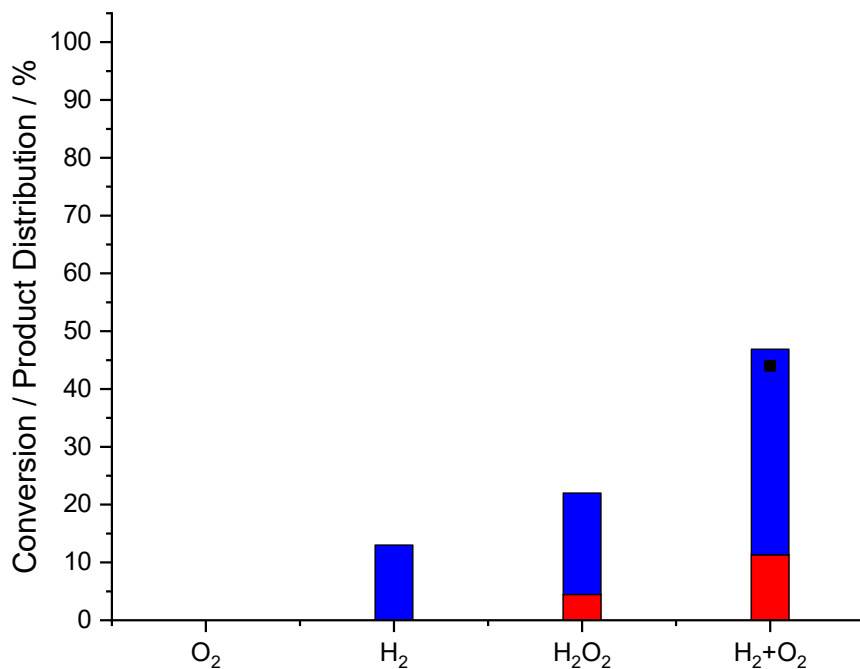

**Figure S.6.** The effect of oxidant on the catalytic activity of 0.5%Pd/0.5%Fe-ZSM-5 catalyst towards the oxidative degradation of phenol. **Key:** Selectivity towards phenolic derivatives (Red bar), Selectivity towards organic acids (Blue bar),  $H_2$  conversion (Black squares). **Phenol oxidation reaction conditions:** Catalyst (0.01 g), Phenol (1000 ppm), 5%  $H_2/CO_2$  (420 psi), 25%  $O_2/CO_2$  (160 psi), 1200 rpm, 30 °C, 2 h. **Note 1:** The concentration of preformed  $H_2O_2$  utilised is comparable to that produced if all  $H_2$  in a standard in-situ reaction is converted to  $H_2O_2$ . **Note 2:** All samples exposed to reductive heat treatment (4 h, 500 °C, 10 °C  $min^{-1}$ , 5% $H_2/Ar$ ).



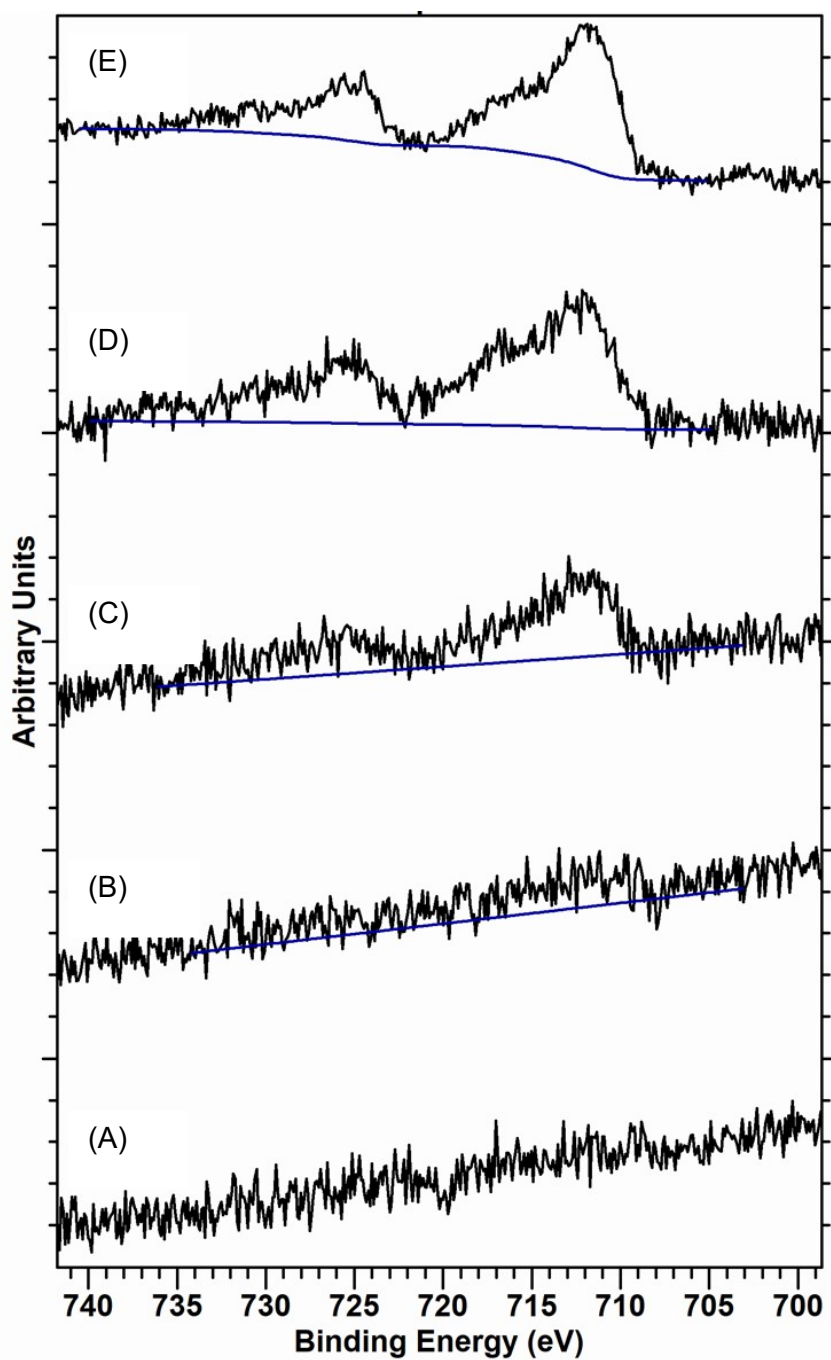

**Figure S.7.** Fe(2p) core levels spectra for **(A)** 0.5%Pd/0.06%Fe-ZSM-5, **(B)** 0.5%Pd/0.125%Fe-ZSM-5, **(C)** 0.5%Pd/0.5%Fe-ZSM-5, **(D)** 0.5%Pd/1%Fe-ZSM-5 and **(E)** 0.5%Pd/3% Fe-ZSM-5. **Note:** All samples exposed to reductive heat treatment (4 h, 500 °C, 10 °C min<sup>-1</sup>, 5%H<sub>2</sub>/Ar).

**Table S.3.** Atomic ratios of key catalytic species, as determined by XPS.

| Catalyst                    | Al 2p | Si 2p | C 1s | Fe 2p | O 1s | Pd 3d (Metallic) | Pd 3d (2+) | Pd <sup>2+</sup> /Pd <sup>0</sup> | Pd/Si  |
|-----------------------------|-------|-------|------|-------|------|------------------|------------|-----------------------------------|--------|
| 0.5wt.%Pd/3.0wt.%Fe/ZSM-5   | 1.9   | 33.4  | 4.8  | 0.3   | 59.6 | 0.03             | 0.01       | 0.33                              | 0.0012 |
| 0.5wt.%Pd/1.0wt.%Fe/ZSM-5   | 1.5   | 33.1  | 6.4  | 0.2   | 58.8 | 0.04             | 0.02       | 0.50                              | 0.0018 |
| 0.5wt.%Pd/0.5wt.%Fe/ZSM-5   | 1.4   | 35.0  | 2.3  | 0.1   | 61.2 | 0.07             | 0.02       | 0.29                              | 0.0026 |
| 0.5wt.%Pd/0.125wt.%Fe/ZSM-5 | 1.6   | 33.2  | 6.2  | 0.0   | 59.0 | 0.02             | 0.02       | 1.00                              | 0.0012 |
| 0.5wt.%Pd/0.06wt.%Fe/ZSM-5  | 1.5   | 32.7  | 8.2  | n/d   | 57.6 | 0.03             | 0.02       | 0.67                              | 0.0015 |
| 0.5wt.%Pd/ZSM-5             | 1.4   | 33.0  | 7.2  | 0.0   | 58.4 | 0.02             | 0.01       | 0.50                              | 0.0009 |

**Note:** All samples exposed to reductive heat treatment (4 h, 500 °C, 10 °C min<sup>-1</sup>, 5%H<sub>2</sub>/Ar).

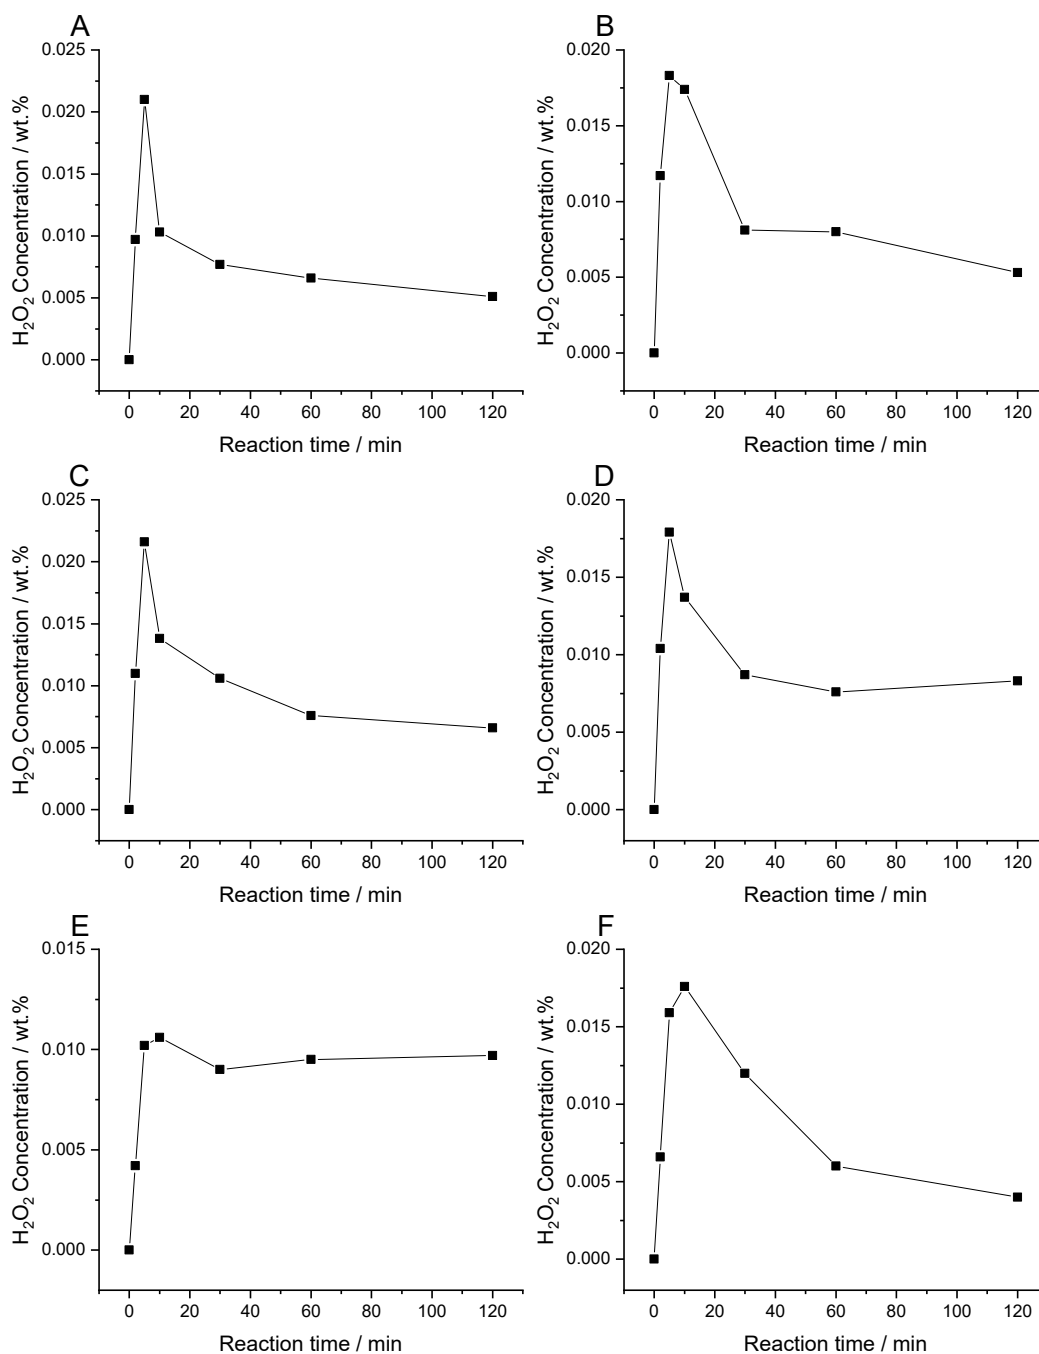

**Figure S.8.** Comparison of catalytic activity towards the direct synthesis of  $H_2O_2$ , as a function of reaction time. **(A)** 0.5%Pd/ZSM-5, **(B)** 0.5%Pd/0.06%Fe-ZSM-5, **(C)** 0.5%Pd/0.125%Fe-ZSM-5, **(D)** 0.5%Pd/0.5%Fe-ZSM-5, **(E)** 0.5%Pd/1%Fe-ZSM-5, **(F)** 0.5%Pd/3%Fe-ZSM-5.  **$H_2O_2$  direct synthesis reaction conditions:** Catalyst (0.01 g),  $H_2O$  (8.5 g), 5% $H_2/CO_2$  (420 psi), 25% $O_2/CO_2$  (160 psi), 30 °C, 1200 rpm. **Note:** All samples exposed to reductive heat treatment (4 h, 500 °C, 10 °C min<sup>-1</sup>, 5% $H_2/Ar$ ).

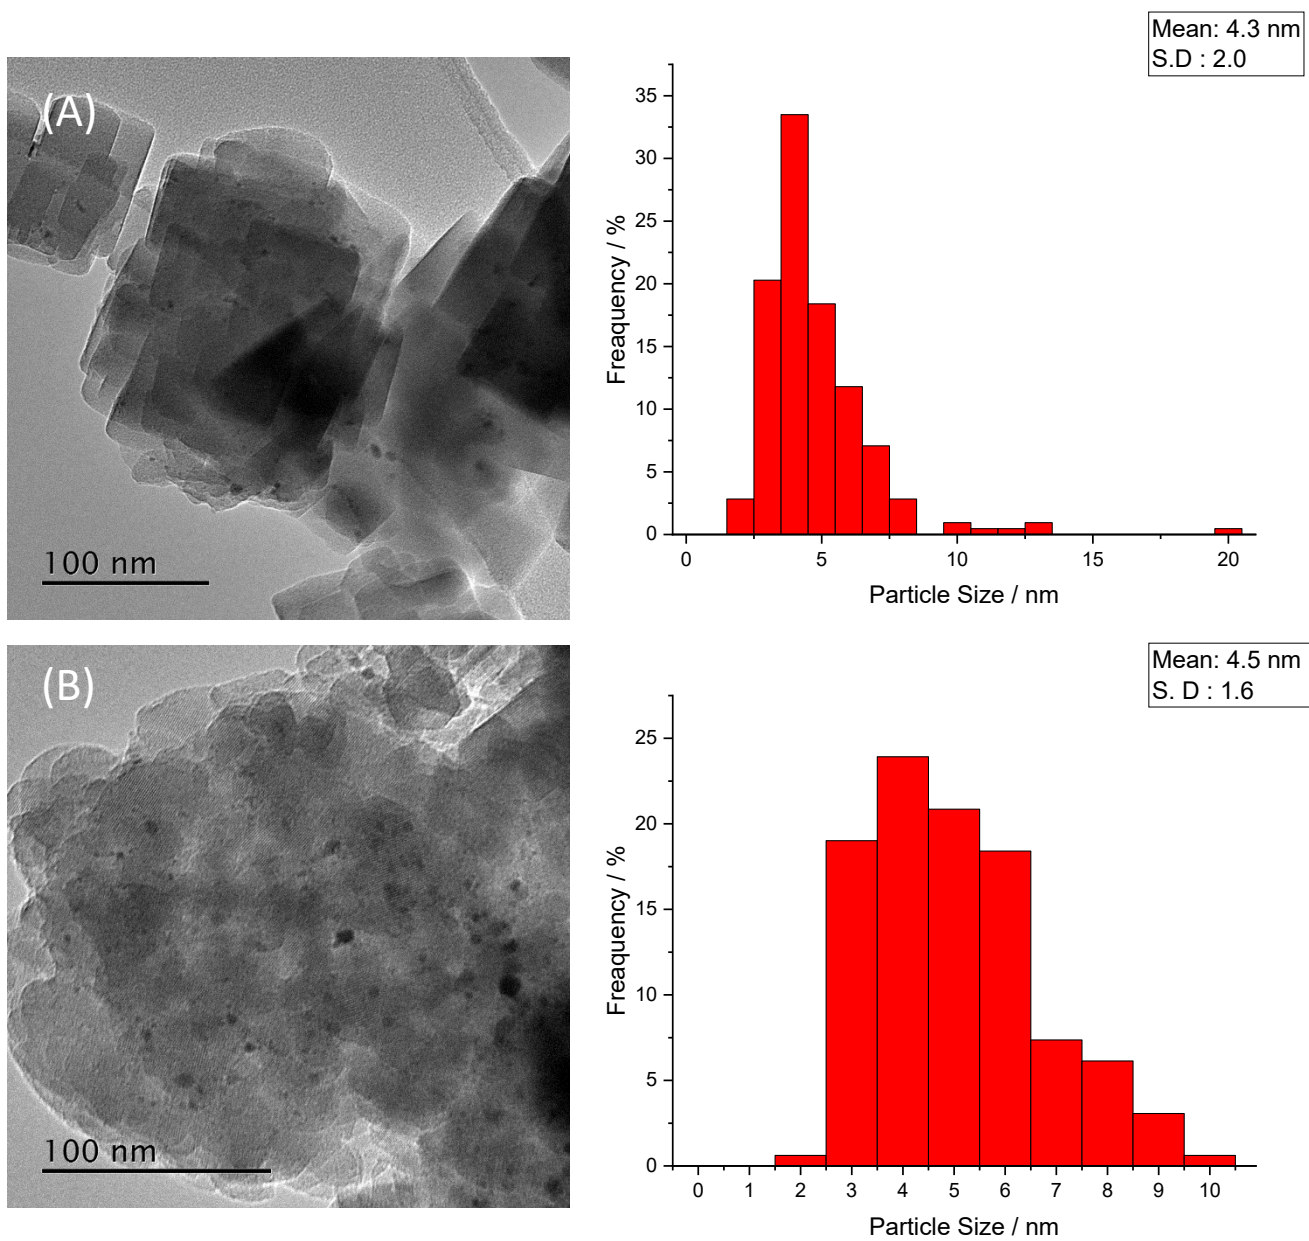

**Figure S.9.** Transmission electron micrographs and corresponding particle size histograms of the as-prepared (A) 0.5%Pd/ZSM-5 and (B) 0.5%Pd/3%Fe-ZSM-5 catalysts. **Note:** All samples exposed to reductive heat treatment (4 h, 500 °C, 10 °C min<sup>-1</sup>, 5% H<sub>2</sub>/Ar).

**Table S.4.** Metal leaching during the oxidative degradation of phenol via in-situ H<sub>2</sub>O<sub>2</sub> synthesis

| Catalyst          | Phenol Conversion / % | Selectivity towards Phenolic Derivatives / % | Selectivity towards Organic Acids / % | Metal Leached / ppm (%) |               |
|-------------------|-----------------------|----------------------------------------------|---------------------------------------|-------------------------|---------------|
|                   |                       |                                              |                                       | Pd                      | Fe            |
| 0.5%Pd/ZSM-5      | 39                    | 29                                           | 71                                    | 0.3<br>(4.4%)           | -             |
| 0.5%Pd/3%Fe-ZSM-5 | 70                    | 29                                           | 71                                    | 0.2<br>(3.0%)           | 2.3<br>(6.4%) |

**Phenol oxidation reaction conditions:** Catalyst (0.01 g), Phenol (100ppm), 5% H<sub>2</sub>/CO<sub>2</sub> (420 psi), 25% O<sub>2</sub>/CO<sub>2</sub> (160 psi), 1200 rpm, 2 h, 30 °C. **Note:** All samples exposed to reductive heat treatment (4 h, 500 °C, 10 °C min<sup>-1</sup>, 5%H<sub>2</sub>/Ar).

**Table S.5.** Product distribution in the oxidative degradation of phenol via in-situ H<sub>2</sub>O<sub>2</sub> synthesis.

| Catalyst                                                                | Time / h | Phenol Conversion / % | Selectivity towards Phenolic Derivatives / % | Selectivity towards Organic Acids |
|-------------------------------------------------------------------------|----------|-----------------------|----------------------------------------------|-----------------------------------|
|                                                                         |          |                       |                                              | / %                               |
| 0.5%Pd/ZSM-5                                                            | 1        | 32.0                  | 26.0                                         | 74.0                              |
|                                                                         | 2        | 38.0                  | 30.0                                         | 70.0                              |
| 0.5%Pd/3%Fe-ZSM-5                                                       | 1        | 56.0                  | 35.0                                         | 65.0                              |
|                                                                         | 2        | 72.0                  | 26.0                                         | 74.0                              |
| 0.5%Pd/3%Fe-ZSM-5 (hot filtration)                                      | 2        | 58.0                  | 29.0                                         | 71.0                              |
| 0.5%Pd/3%Fe-ZSM-5 (hot filtration) with 0.5%Pd/ZSM-5                    | 2        | 72.0                  | 16.0                                         | 84.0                              |
| 0.5%Pd/3%Fe-ZSM-5 (hot filtration) with H <sub>2</sub> O <sub>2</sub> * | 2        | 65.0                  | 22.0                                         | 78.0                              |

**Phenol oxidation reaction conditions:** Catalyst (0.01 g), Phenol (1000ppm), 5% H<sub>2</sub>/CO<sub>2</sub> (420 psi), 25% O<sub>2</sub>/CO<sub>2</sub> (160 psi), 1200 rpm, 30 °C. \*During the second 1 h hot-filtration experiment a concentration of H<sub>2</sub>O<sub>2</sub> was used that was identical to that if all the H<sub>2</sub> in a standard in-situ reaction was converted to H<sub>2</sub>O<sub>2</sub>, an atmosphere of 25%O<sub>2</sub>/CO<sub>2</sub> (580 psi) was used. **Note:** All samples exposed to reductive heat treatment (4 h, 500 °C, 10 °C min<sup>-1</sup>, 5%H<sub>2</sub>/Ar).

## References.

1. J. Xu, R. D. Armstrong, G. Shaw, N. F. Dummer, S. J. Freakley, S. H. Taylor and G. J. Hutchings, *Catal. Today*, 2016, **270**, 93-100.
2. L. Shirazi, E. Jamshidi and M. R. Ghasemi, *Cryst. Res. Technol.*, 2008, **43**, 1300-1306.
3. R. J. Lewis, A. Bara-Estaun, N. Agarwal, S. J. Freakley, D. J. Morgan and G. J. Hutchings, *Catal. Lett.*, 2019, **149**, 3066-3075.
